# Supplementary material for: RNA sequencing reveals molecular mechanisms of endometriosis lesion development in mice
Source: PubMed Central journal article supplement (PMC11524442; doi:10.1242/dmm.050566), 2024-10-23
Supplement: dmm-17-050566-s1.pdf [file dmm-17-050566-s1.pdf]

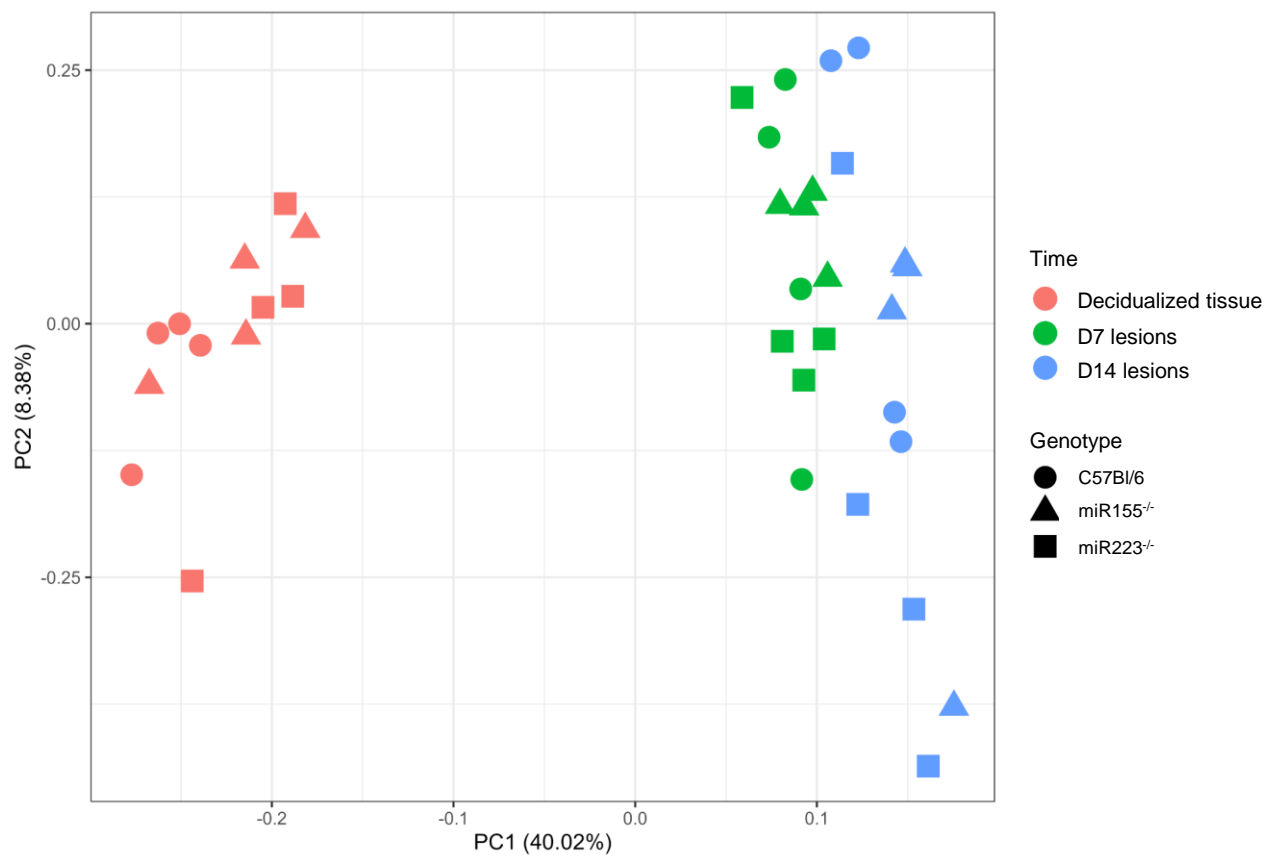

**Fig. S1. Principal component analysis plot for all 36 samples used in the analysis.** A principal component analysis (PCA) plot was constructed to further explore the relationships amongst the 36 different samples in the dataset, and provides additional evidence of the clear separation between decidualized endometrial samples and lesion samples, reinforcing the robustness of the observed distinctions.



**Fig. S2. Expression of human orthologues corresponding to mouse genes from our dataset.** A selection of DEGs common to both Day 7 (D7) and Day 14 (D14) versus endometrium ( $\log_2FC \geq \pm 2$ ,  $FDR \leq 0.05$ ) were identified and converted into human orthologous genes using BioMart. The expression of orthologous genes was evaluated in publicly available human datasets comparing patient endometrium and peritoneal lesions, utilizing the EndometDB database (<https://endometdb.utu.fi/>) and presents as **(A)** Heatmap depicting the expression levels of human orthologues corresponding to upregulated mouse genes, and **(B)** Heatmap depicting the expression levels of human orthologues corresponding to downregulated mouse genes.

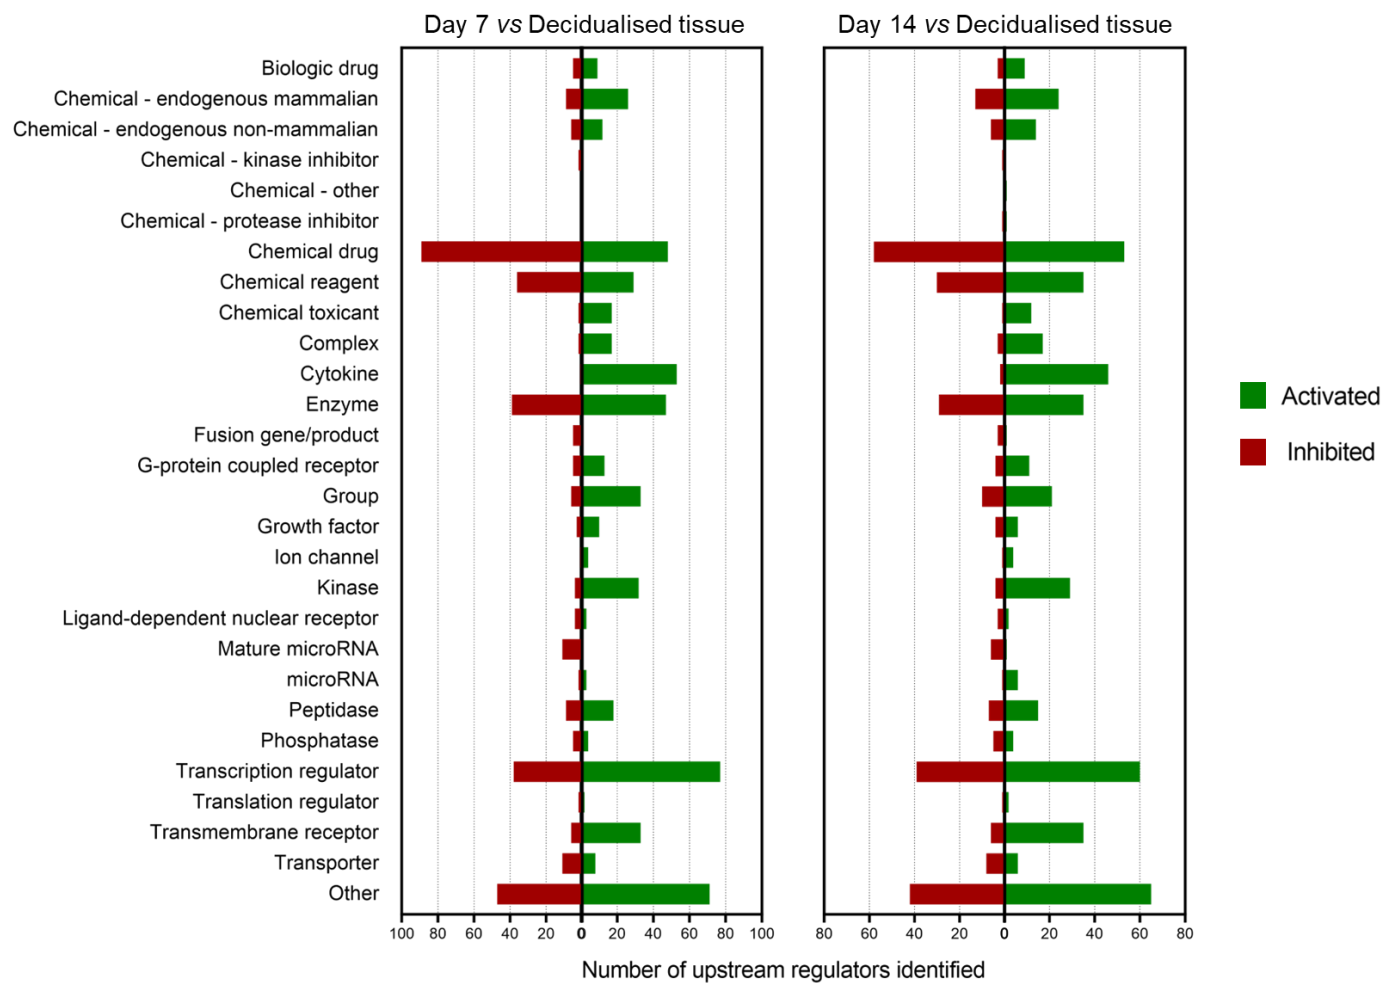

**Fig. S3. Classification of molecules predicted to be upstream of genes regulated in Day 7 and Day 14 endometriosis-like lesions vs decidualized endometrium identified by IPA.**

Predicted upstream regulators were grouped into 28 molecular categories. All upstream regulators have a Z- activation score of  $\geq +2$  or  $\leq -2$ , and corresponding  $p$ -value of  $\leq 0.05$ .

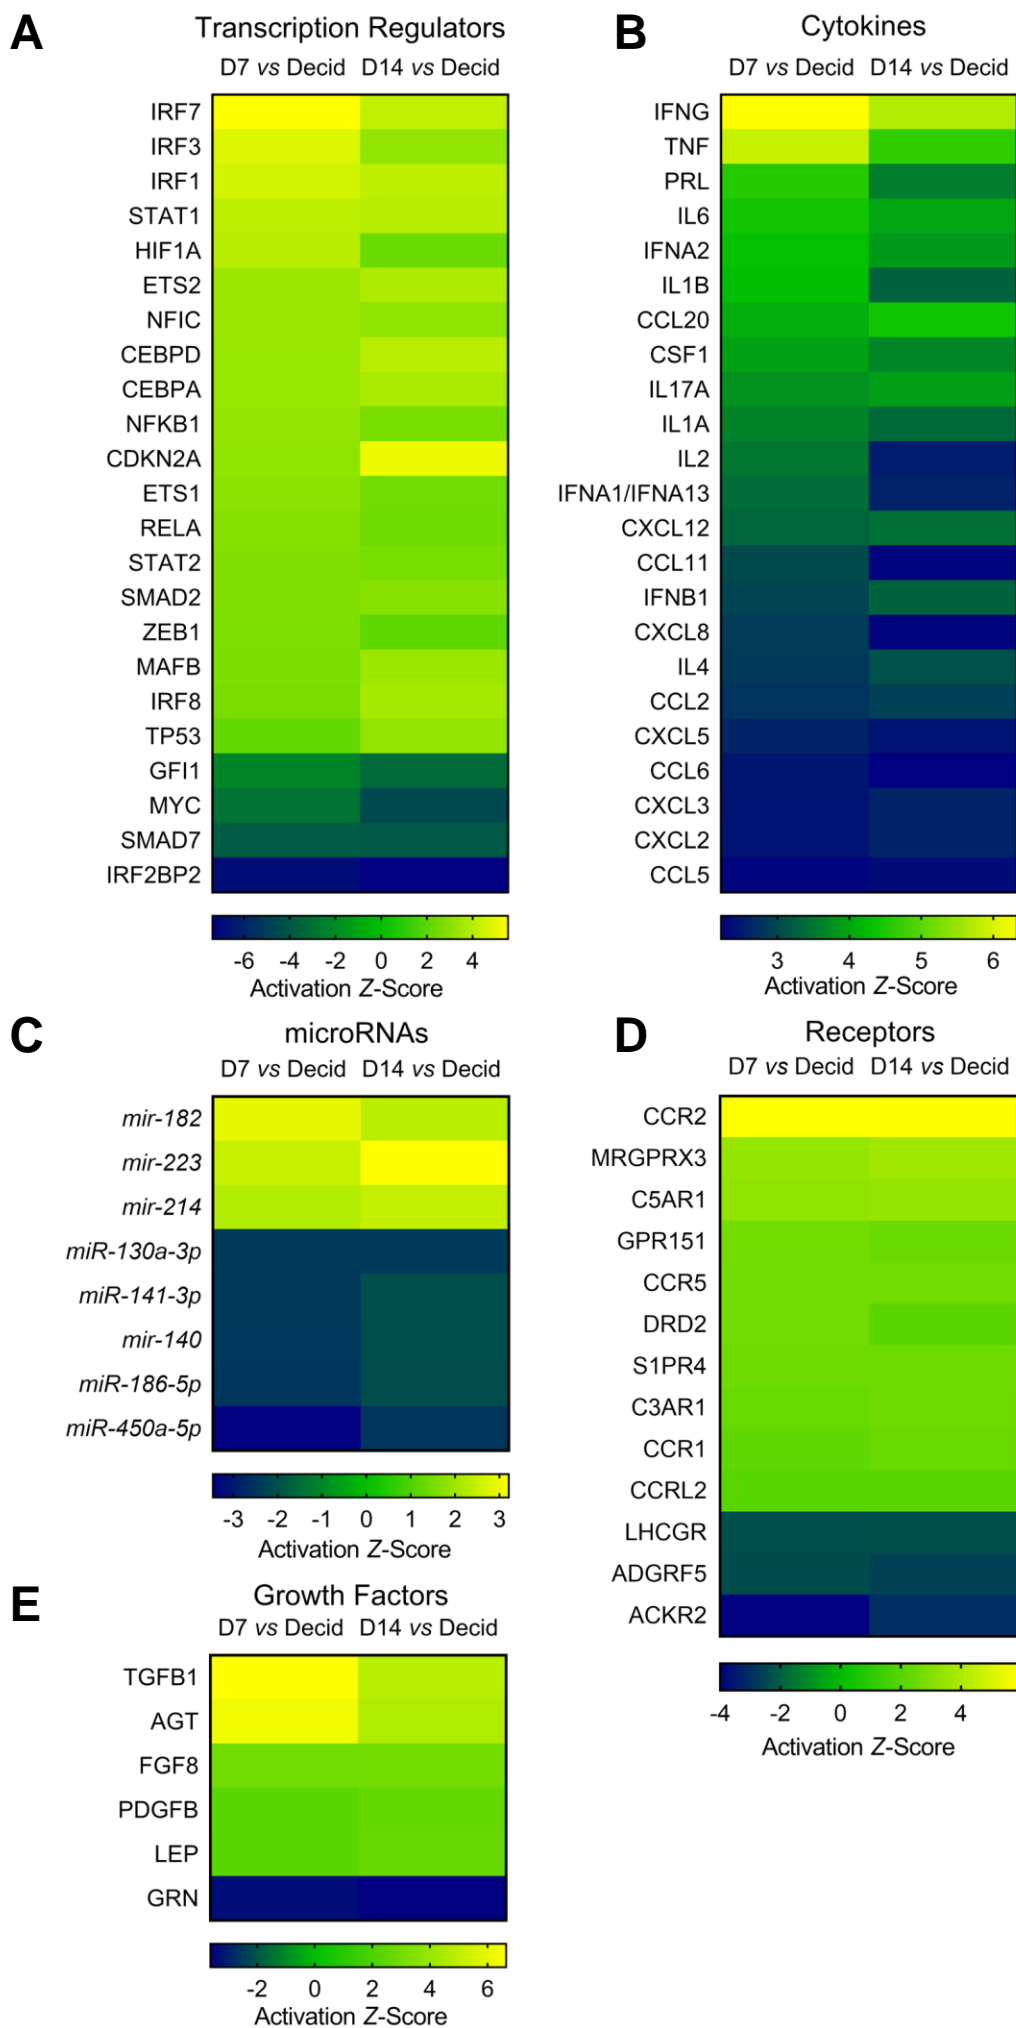

**Fig. S4. Predicted upstream regulators of genes identified in D7 and D14 endometriosis-like lesions compared to decidualized endometrium.** Upstream regulators of pathways were identified by IPA [Z- score of  $\geq +2$  or  $\leq -2$ ] and heatmaps were generated to show comparisons between Day 7 lesions vs Decidualized endometrium (Decid) and Day 14 lesions vs Decidualized endometrium (Decid) for the categories of **(A)** transcription regulators, **(B)** cytokines, **(C)** microRNAs **(D)** receptors, and **(E)** growth factors. Note: This list is not exhaustive; complete list of upstream regulators are available in the Supplementary Material (Table S6 and S7).

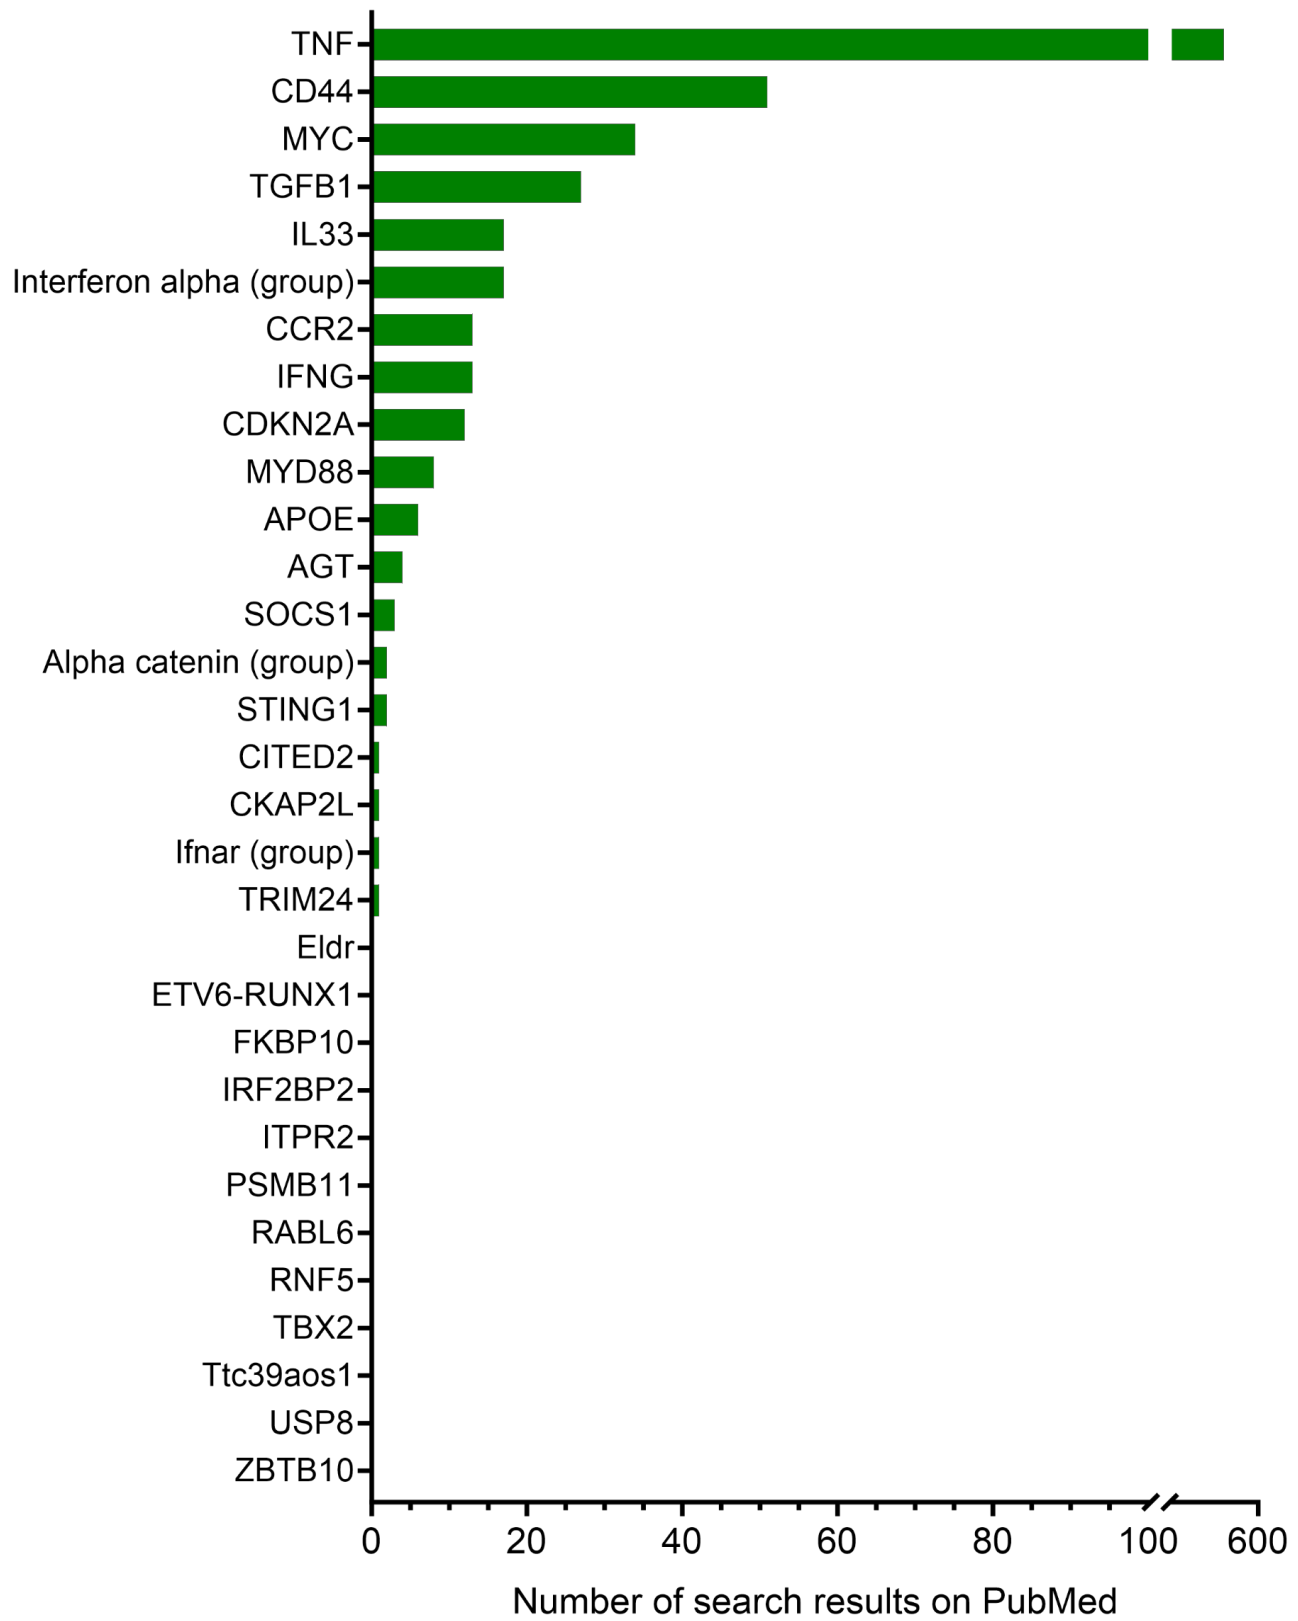

**Fig. S5. Number of published studies in the scientific literature reporting top predicted endogenous upstream regulators in comparisons between endometriosis-like lesions and decidualized endometrium.** Data depict the number of search results returned via the PubMed Search Engine for individual top 10 activated and inhibited endogenous upstream regulators of endometriosis (see Figure 6A in main paper for details). PubMed searches were performed using the search terms ‘molecule symbol’ AND ‘endometriosis’.



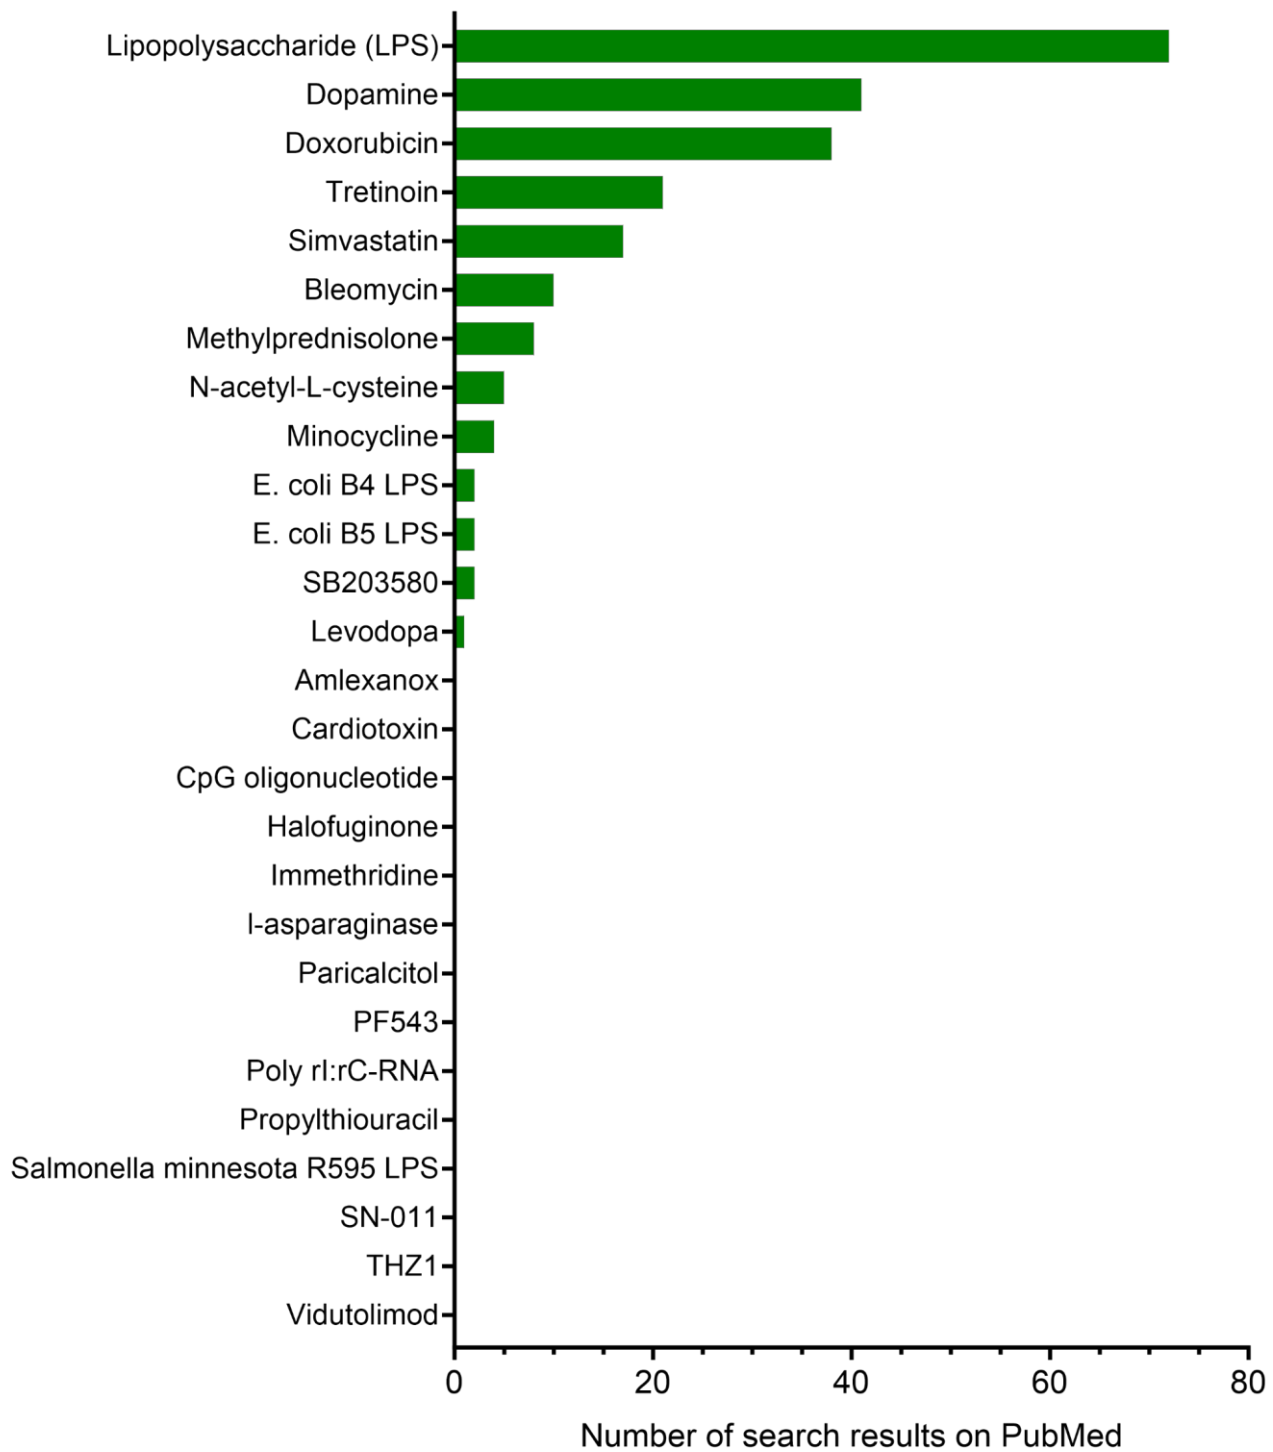

**Fig. S6. Number of published studies in the scientific literature reporting top predicted non-endogenous upstream regulators in comparisons between endometriosis-like lesions and decidualized endometrium.** Data depict the number of search results returned via the PubMed Search Engine for individual top 10 activated and inhibited non-endogenous upstream regulators of endometriosis (see Figure 6B in main paper for details). PubMed searches were performed using the search terms ‘molecule symbol’ AND ‘endometriosis’.

**Table S1. Differentially Expressed Genes (DEGs) identified in D7 endometriosis-like lesions vs decidialized endometrium from C57Bl/6 mice.**

Available for download at

<https://journals.biologists.com/dmm/article-lookup/doi/10.1242/dmm.050566#supplementary-data>

**Table S2. Differentially Expressed Genes (DEGs) identified in D14 endometriosis-like lesions vs decidialized endometrium from C57Bl/6 mice.**

Available for download at

<https://journals.biologists.com/dmm/article-lookup/doi/10.1242/dmm.050566#supplementary-data>

**Table S3. Differentially Expressed Genes (DEGs) identified in D14 vs D7 endometriosis-like lesions from C57Bl/6 mice.**

Available for download at

<https://journals.biologists.com/dmm/article-lookup/doi/10.1242/dmm.050566#supplementary-data>

**Table S4. Ingenuity Canonical Pathways identified in D7 endometriosis-like lesions vs decidialized endometrium from C57Bl/6 mice.**

Available for download at

<https://journals.biologists.com/dmm/article-lookup/doi/10.1242/dmm.050566#supplementary-data>

**Table S5. Ingenuity Canonical Pathways identified in D14 endometriosis-like lesions vs decidialized endometrium from C57Bl/6 mice.**

Available for download at

<https://journals.biologists.com/dmm/article-lookup/doi/10.1242/dmm.050566#supplementary-data>

**Table S6. Upstream regulators identified in D7 endometriosis-like lesions vs decidualized endometrium from C57Bl/6 mice.**

Available for download at

<https://journals.biologists.com/dmm/article-lookup/doi/10.1242/dmm.050566#supplementary-data>

**Table S7. Upstream regulators identified in D14 endometriosis-like lesions vs decidualized endometrium from C57Bl/6 mice.**

Available for download at

<https://journals.biologists.com/dmm/article-lookup/doi/10.1242/dmm.050566#supplementary-data>

**Table S8. Number of reads generated per RNA sample.**

Available for download at

<https://journals.biologists.com/dmm/article-lookup/doi/10.1242/dmm.050566#supplementary-data>
